# Supplementary material for: The Mitochondrial Genome of Cylicocyclus elongatus (Strongylida: Strongylidae) and Its Comparative Analysis with Other Cylicocyclus Species
Source: MDPI journal article supplement (doi:10.3390/ani12121571), 2022-06-17
Supplement: s1 [file s1]

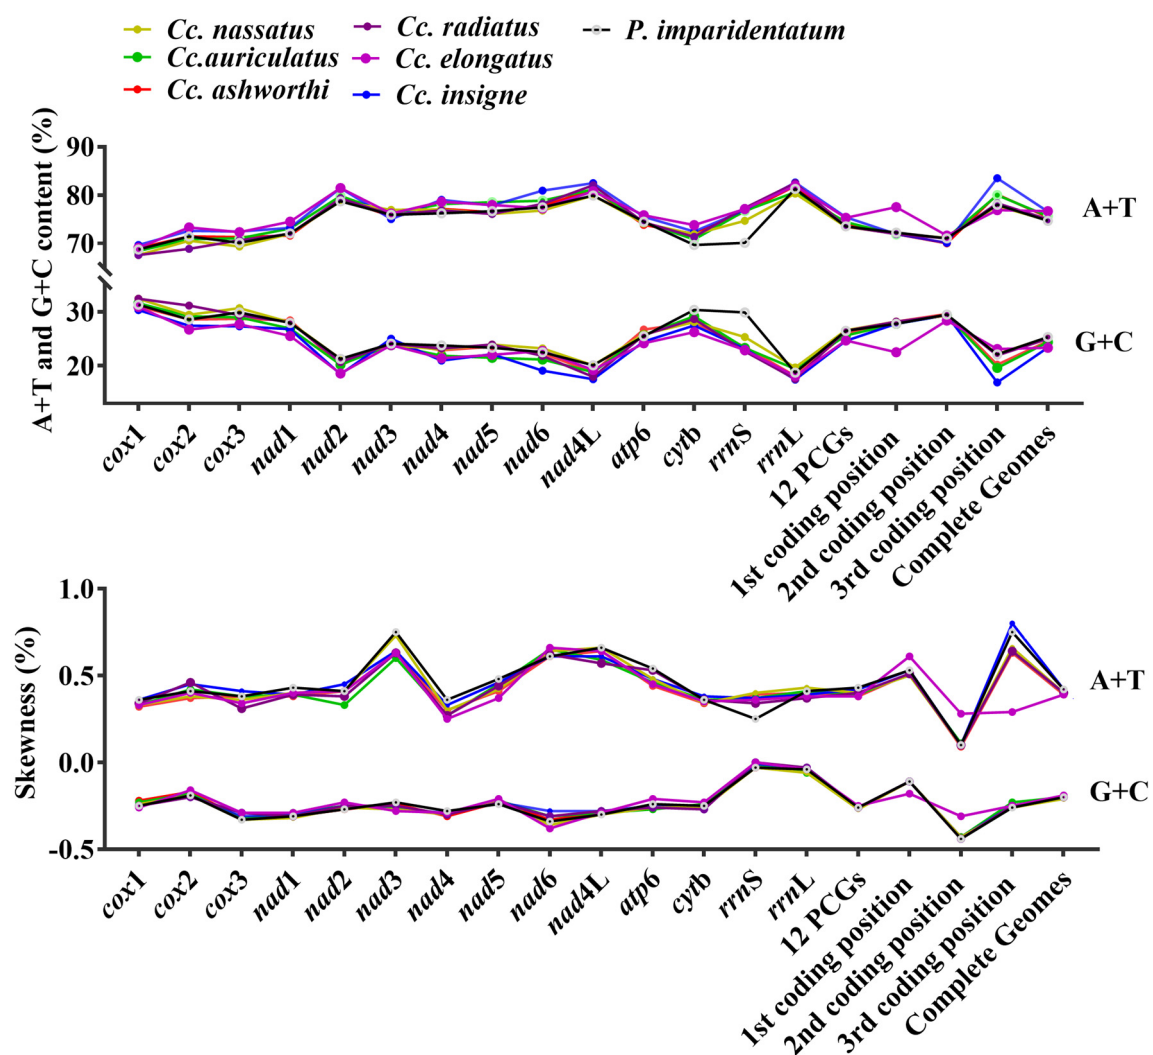

**Figure S1.** A + T and G + C contents and skews of 12 PCGs, rRNAs, tRNAs, and complete mt genome sequences of *Cc. elongatus*.

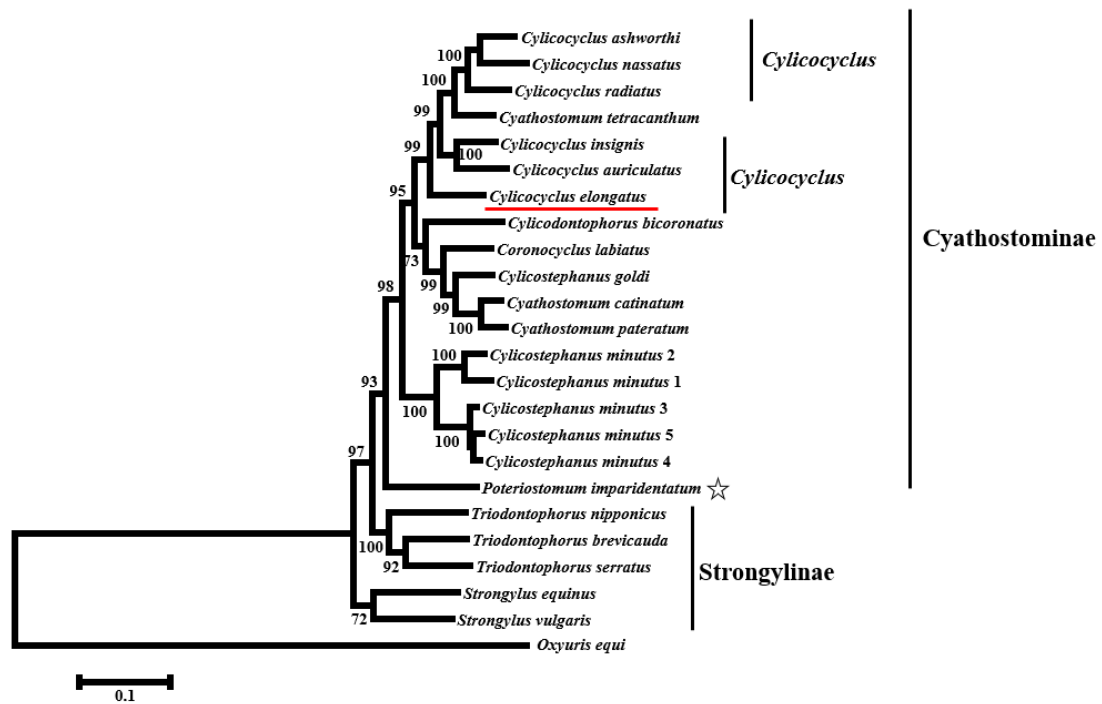

**Figure S2.** Phylogenetic analyses reconstructed using nucleotide sequences of complete mt genome sequences in 23 Strongylidae species. The tree was developed using ML method. *Oxyuris equi* is an outgroup. *Cc. elongatus* in current study is underlined.
