# Supplementary material for: The Mitochondrial Genome of Cylicocyclus elongatus (Strongylida: Strongylidae) and Its Comparative Analysis with Other Cylicocyclus Species
Source: MDPI journal article supplement (doi:10.3390/ani12121571), 2022-06-17
Supplement: s1 [file s1]

**Table S1.** PCR primers used in the amplification of complete mt genomes.

| Primer name         | Sequence (5' to 3')       |
|---------------------|---------------------------|
| <i>cox1-rrnL-F</i>  | CCATTATTATTATGAGTTTTAGGCT |
| <i>cox1-rrnL-R</i>  | CCTTAATGTCCTCACGCTAAGACTG |
| <i>rrnL-nad5-F</i>  | AAAGTTGAAGTATTTTTATAGTTAG |
| <i>rrnL-nad5-R</i>  | ACCACACAAACAAAACAAAGTAATC |
| <i>nad5-nad4L-F</i> | TTTCAAGTGTGCTGCTATAGTGGA  |
| <i>nad5-nad4L-R</i> | ATACTAAAGCCTCAAATTCAACTTA |
| <i>nad4L-atp6-F</i> | TAAAGTTTTATGGCAGAGATCAGTG |
| <i>nad4L-atp6-R</i> | AAGTTCTTAATCATGCTACTATGGC |
| <i>atp6- nad2-F</i> | CCTTGTGGAATGGTGGAGTTTACTT |
| <i>atp6- nad2-R</i> | CTAATATAGTCTCTCACCCAATAA  |
| <i>nad2- cox3-F</i> | TTAATTCTTTCGTCAACGGAATCAT |
| <i>nad2- cox3-R</i> | AAAATTACCAACGAGCTTGTCAAAC |
| <i>cox3-nad4-F</i>  | TTTTTGCTTCTTTGGGTTTGACAAG |
| <i>cox3-nad4-R</i>  | CATAAAATAATAAATAATAACCTGA |
| <i>nad4- cox1-F</i> | TTGTTTGTTTTTTTTTATTCTAGC  |
| <i>nad4- cox1-R</i> | AATGACTAACCACATAATAAGTATC |
