# Supplementary material for: The Mitochondrial Genome of Cylicocyclus elongatus (Strongylida: Strongylidae) and Its Comparative Analysis with Other Cylicocyclus Species
Source: MDPI journal article supplement (doi:10.3390/ani12121571), 2022-06-17
Supplement: s1 [file s1]

|               |           |           |           |           |           |           |           |
|---------------|-----------|-----------|-----------|-----------|-----------|-----------|-----------|
| <i>P. i</i>   | 89.7/94.8 | —         | —         | —         | —         | —         | —         |
| <i>Cc. as</i> | 92.3/100  | 87.2/94.8 | —         | —         | —         | —         | —         |
| <i>Cc. r</i>  | 92.3/100  | 87.2/94.8 | 95.3/100  | —         | —         | —         | —         |
| <i>Cc. au</i> | 92.7/100  | 89.3/94.8 | 91.0/100  | 92.3/100  | —         | —         | —         |
| <i>Cc. n</i>  | 93.6/98.7 | 87.2/96.1 | 93.6/98.7 | 91.9/98.7 | 91.0/98.7 | —         | —         |
| <i>Cc.el</i>  | 92.3/100  | 90.2/94.8 | 92.3/100  | 91.9/100  | 91.5/100  | 91.0/98.7 | —         |
| <b>rrnS</b>   | 700/—     | 709/—     | 711/—     | 697/—     | 699/—     | 699/—     | 699/—     |
| <i>P. i</i>   | 79.5/—    | —         | —         | —         | —         | —         | —         |
| <i>Cc. as</i> | 94.8/—    | 79.4/—    | —         | —         | —         | —         | —         |
| <i>Cc. r</i>  | 95.9/—    | 80.1/—    | 97.5/—    | —         | —         | —         | —         |
| <i>Cc. au</i> | 95.3/—    | 78.7/—    | 94.2/—    | 94.6/—    | —         | —         | —         |
| <i>Cc. n</i>  | 94.8/—    | 78.2/—    | 94.6/—    | 95.3/—    | 93.5/—    | —         | —         |
| <i>Cc.el</i>  | 95.2/—    | 80.1/—    | 95.6/—    | 96.0/—    | 94.4/—    | 94.4/—    | —         |
| <b>nad1</b>   | 873/290   | 873/290   | 873/290   | 873/290   | 873/290   | 873/290   | 873/290   |
| <i>P. i</i>   | 84.8/94.5 | —         | —         | —         | —         | —         | —         |
| <i>Cc. as</i> | 89.0/96.6 | 85.3/91.7 | —         | —         | —         | —         | —         |
| <i>Cc. r</i>  | 88.9/98.6 | 86.5/94.1 | 90.7/95.9 | —         | —         | —         | —         |
| <i>Cc. au</i> | 90.6/97.9 | 85.0/94.1 | 88.2/95.2 | 87.4/97.2 | —         | —         | —         |
| <i>Cc. n</i>  | 89.6/98.6 | 86.4/94.5 | 89.3/95.9 | 89.3/97.9 | 88.0/97.2 | —         | —         |
| <i>Cc.el</i>  | 88.9/97.2 | 86.3/92.8 | 87.6/94.5 | 87.3/96.6 | 89.0/95.9 | 88.2/96.6 | —         |
| <b>atp6</b>   | 600/199   | 600/199   | 600/199   | 600/199   | 600/199   | 600/199   | 600/199   |
| <i>P. i</i>   | 88.3/95.5 | —         | —         | —         | —         | —         | —         |
| <i>Cc. as</i> | 90.5/99.0 | 86.8/94.5 | —         | —         | —         | —         | —         |
| <i>Cc. r</i>  | 89.0/99.0 | 85.7/94.5 | 90.3/98.0 | —         | —         | —         | —         |
| <i>Cc. au</i> | 91.3/98.0 | 86.2/93.5 | 88.7/97.0 | 89.8/98.0 | —         | —         | —         |
| <i>Cc. n</i>  | 88.0/97.5 | 87.3/94.5 | 89.2/96.5 | 89.8/97.5 | 86.5/96.5 | —         | —         |
| <i>Cc.el</i>  | 88.5/97.5 | 85.7/94.0 | 87.5/96.5 | 88.5/97.5 | 87.0/96.5 | 88.3/98.5 | —         |
| <b>nad2</b>   | 846/281   | 846/281   | 846/281   | 846/281   | 846/281   | 846/281   | 846/281   |
| <i>P. i</i>   | 80.7/84.0 | —         | —         | —         | —         | —         | —         |
| <i>Cc. as</i> | 85.0/89.0 | 80.6/84.0 | —         | —         | —         | —         | —         |
| <i>Cc. r</i>  | 85.7/93.2 | 82.7/87.9 | 89.6/94.3 | —         | —         | —         | —         |
| <i>Cc. au</i> | 87.6/93.6 | 82.2/87.2 | 86.5/92.2 | 88.3/96.4 | —         | —         | —         |
| <i>Cc. n</i>  | 86.5/93.2 | 81.4/88.3 | 91.3/93.2 | 88.5/96.1 | 87.0/96.1 | —         | —         |
| <i>Cc.el</i>  | 87.8/94.3 | 81.4/86.8 | 86.2/91.5 | 87.6/95.4 | 87.5/96.1 | 87.9/95.7 | —         |
| <b>cytb</b>   | 1,113/370 | 1,113/370 | 1,113/370 | 1,113/370 | 1,113/370 | 1,113/370 | 1,113/370 |
| <i>P. i</i>   | 83.0/89.5 | —         | —         | —         | —         | —         | —         |
| <i>Cc. as</i> | 87.8/95.4 | 83.7/90.0 | —         | —         | —         | —         | —         |
| <i>Cc. r</i>  | 86.8/95.7 | 83.6/89.5 | 90.8/98.1 | —         | —         | —         | —         |
| <i>Cc. au</i> | 87.3/95.1 | 82.7/87.8 | 86.4/95.1 | 86.0/95.9 | —         | —         | —         |
| <i>Cc. n</i>  | 87.4/94.6 | 82.1/88.9 | 90.8/97.6 | 89.9/98.6 | 86.2/95.4 | —         | —         |
| <i>Cc.el</i>  | 88.1/94.1 | 83.2/88.9 | 86.8/98.5 | 87.2/96.2 | 86.9/94.9 | 87.2/95.4 | —         |
| <b>cox3</b>   | 769/256   | 766/255   | 766/255   | 766/255   | 766/255   | 766/255   | 769/256   |
| <i>P. i</i>   | 86.1/96.1 | —         | —         | —         | —         | —         | —         |
| <i>Cc. as</i> | 87.9/97.7 | 86.0/95.7 | —         | —         | —         | —         | —         |
| <i>Cc. r</i>  | 88.6/98.8 | 85.2/96.9 | 90.1/98.8 | —         | —         | —         | —         |

|               |           |           |           |           |           |           |           |
|---------------|-----------|-----------|-----------|-----------|-----------|-----------|-----------|
| <i>Cc. au</i> | 88.8/97.7 | 84.8/97.3 | 88.4/97.7 | 87.8/98.8 | —         | —         | —         |
| <i>Cc. n</i>  | 88.7/97.3 | 85.4/96.5 | 88.8/96.5 | 88.7/97.7 | 88.8/97.7 | —         | —         |
| <i>Cc.el</i>  | 88.0/98.4 | 86.2/96.1 | 87.6/96.9 | 87.4/98.0 | 87.3/97.7 | 87.1/96.9 | —         |
| <b>nad4</b>   | 1,230/409 | 1,227/408 | 1,230/409 | 1,230/409 | 1,230/409 | 1,230/409 | 1,230/409 |
| <i>P. i</i>   | 85.4/90.2 | —         | —         | —         | —         | —         | —         |
| <i>Cc. as</i> | 90.2/97.8 | 83.8/88.8 | —         | —         | —         | —         | —         |
| <i>Cc. r</i>  | 89.9/97.8 | 84.4/89.7 | 91.4/97.1 | —         | —         | —         | —         |
| <i>Cc. au</i> | 90.2/96.3 | 84.6/89.5 | 88.5/95.6 | 89.3/95.6 | —         | —         | —         |
| <i>Cc. n</i>  | 89.6/98.3 | 84.3/90.2 | 89.6/98.0 | 90.8/97.6 | 88.6/96.1 | —         | —         |
| <i>Cc.el</i>  | 90.1/97.3 | 85.1/89.5 | 89.5/96.8 | 89.4/96.6 | 88.5/94.9 | 88.9/97.6 | —         |
| <b>SNCR</b>   | 88/—      | 84/—      | 82/—      | 82/—      | 89/—      | 79/—      | 81/—      |
